# Supplementary material for: Views and opinions of patients with glaucoma and age-related macular degeneration on vision home-monitoring: a UK-based focus group study
Source: PubMed Central journal article supplement (PMC11253750; doi:10.1136/bmjopen-2023-080619), 2024-07-12
Supplement: bmjopen-14-7-s002.pdf [file bmjopen-14-7-s002.pdf]

**Supplementary materials- IF THIS MANUSCRIPT IS ACCEPTED, ALL SUPPLEMENTAL MATERIAL WILL BE REFORMATTED AS A STANDALONE PDF OR WORD DOCUMENT**

|   |                                                                                                                                                                                               |
|---|-----------------------------------------------------------------------------------------------------------------------------------------------------------------------------------------------|
| 1 | What are your overall thoughts on the system? (Prompts: did you think the system was user friendly? Would you recommend this to a friend? Would you use it?)                                  |
| 2 | What do you think about the idea of telemedicine ? (Prompts: Do you like the idea of being able to do the tests at home? What do you think are the advantages/disadvantages of telemedicine?) |
| 3 | This app is recommended to be used once every two weeks, would you be likely to do this?                                                                                                      |
| 4 | What would make you stop using them? What would discourage you from using them?                                                                                                               |
| 5 | How often would you use these apps/systems? (Prompts: Every week? Twice a week? Never? What would motivate you to maintain your use of them?)                                                 |

**Table S1-** Focus group conversation topic guide used by the focus group facilitators
