# Supplementary material for: Views and opinions of patients with glaucoma and age-related macular degeneration on vision home-monitoring: a UK-based focus group study
Source: PubMed Central journal article supplement (PMC11253750; doi:10.1136/bmjopen-2023-080619), 2024-07-12
Supplement: bmjopen-14-7-s003.pdf [file bmjopen-14-7-s003.pdf]

**Supplementary materials- IF THIS MANUSCRIPT IS ACCEPTED, ALL SUPPLEMENTAL MATERIAL WILL BE REFORMATTED AS A STANDALONE PDF OR WORD DOCUMENT**

| <b>Features</b>                                                                                             |
|-------------------------------------------------------------------------------------------------------------|
| I would like the app/device to send me text reminders to do the test                                        |
| I would like the app to read the instructions out loud                                                      |
| I would like to see my results at the end of the test                                                       |
| I would like the app to tell me if there has been a change in my score and if I need to see my practitioner |
| I would like to receive confirmation that my results have been seen by my practitioner                      |
| I would like to be supervised doing the test by my practitioner                                             |

**Table S2-** Table listing the statements presented to participants during the focus group session. Participants were asked to rate these statements from most to least important.
