# Supplementary material for: Views and opinions of patients with glaucoma and age-related macular degeneration on vision home-monitoring: a UK-based focus group study
Source: PubMed Central journal article supplement (PMC11253750; doi:10.1136/bmjopen-2023-080619), 2024-07-12
Supplement: bmjopen-14-7-s005.pdf [file bmjopen-14-7-s005.pdf]

**Supplementary materials- IF THIS MANUSCRIPT IS ACCEPTED, ALL SUPPLEMENTAL MATERIAL WILL BE REFORMATTED AS A STANDALONE PDF OR WORD DOCUMENT**

| <b>Participant number</b> | <b>Age</b> | <b>Diagnosis</b>               |
|---------------------------|------------|--------------------------------|
| <b>AMD P1</b>             | 80         | Unilateral wet AMD             |
| <b>AMD P2</b>             | 73         | Bilateral dry AMD              |
| <b>AMD P3</b>             | 84         | Bilateral wet AMD              |
| <b>AMD P4</b>             | 93         | Unilateral wet AMD             |
| <b>AMD P5</b>             | 77         | Bilateral dry AMD              |
| <b>AMD P6</b>             | 49         | Bilateral dry AMD              |
| <b>AMD P7</b>             | 77         | Bilateral dry AMD              |
| <b>Glaucoma P1</b>        | 79         | Primary open angle glaucoma    |
| <b>Glaucoma P2</b>        | 85         | Normal tension glaucoma        |
| <b>Glaucoma P3</b>        |            | Primary angle closure glaucoma |
| <b>Glaucoma P4</b>        | 77         | Normal tension glaucoma        |
| <b>Glaucoma P5</b>        | 65         | Primary angle closure glaucoma |
| <b>Glaucoma P6</b>        | 70         | Normal tension glaucoma        |
| <b>Glaucoma P7</b>        | 68         | Primary open angle glaucoma    |
| <b>Glaucoma P8</b>        | 50         | Primary angle closure glaucoma |

**Table S3:** Table showing participant demographic and diagnosis information. Glaucoma participant 3 was unable to be contacted for their age and therefore this information could not be presented.
